# Supplementary material for: Silencing miR-21-5p in sensory neurons reverses neuropathic allodynia via activation of TGF-β–related pathway in macrophages
Source: JCI journal article supplement (doi:10.1172/jci164472), 2023-04-18
Supplement: sd1 [file 1]

**Silencing miR-21-5p in sensory neurons reverses neuropathic allodynia via activation of TGFB-related pathway in macrophages**

Lynda Zeboudj, George Sideris-Lampretsas, Rita Silva, Sabeha Al-Mударis, Francesca Picco, Sarah Fox, David Chambers, Marzia Malcangio.

Wolfson Centre for Age Related Diseases, King's College London, London SE1 1UL, UK.

Correspondence to Marzia Malcangio ([marzia.malcangio@kcl.ac.uk](mailto:marzia.malcangio@kcl.ac.uk)) Wolfson Centre for Age Related Diseases, King's College London, London SE1 1UL, UK.

The authors have declared that no conflict of interest exists.

Supplementary Figures

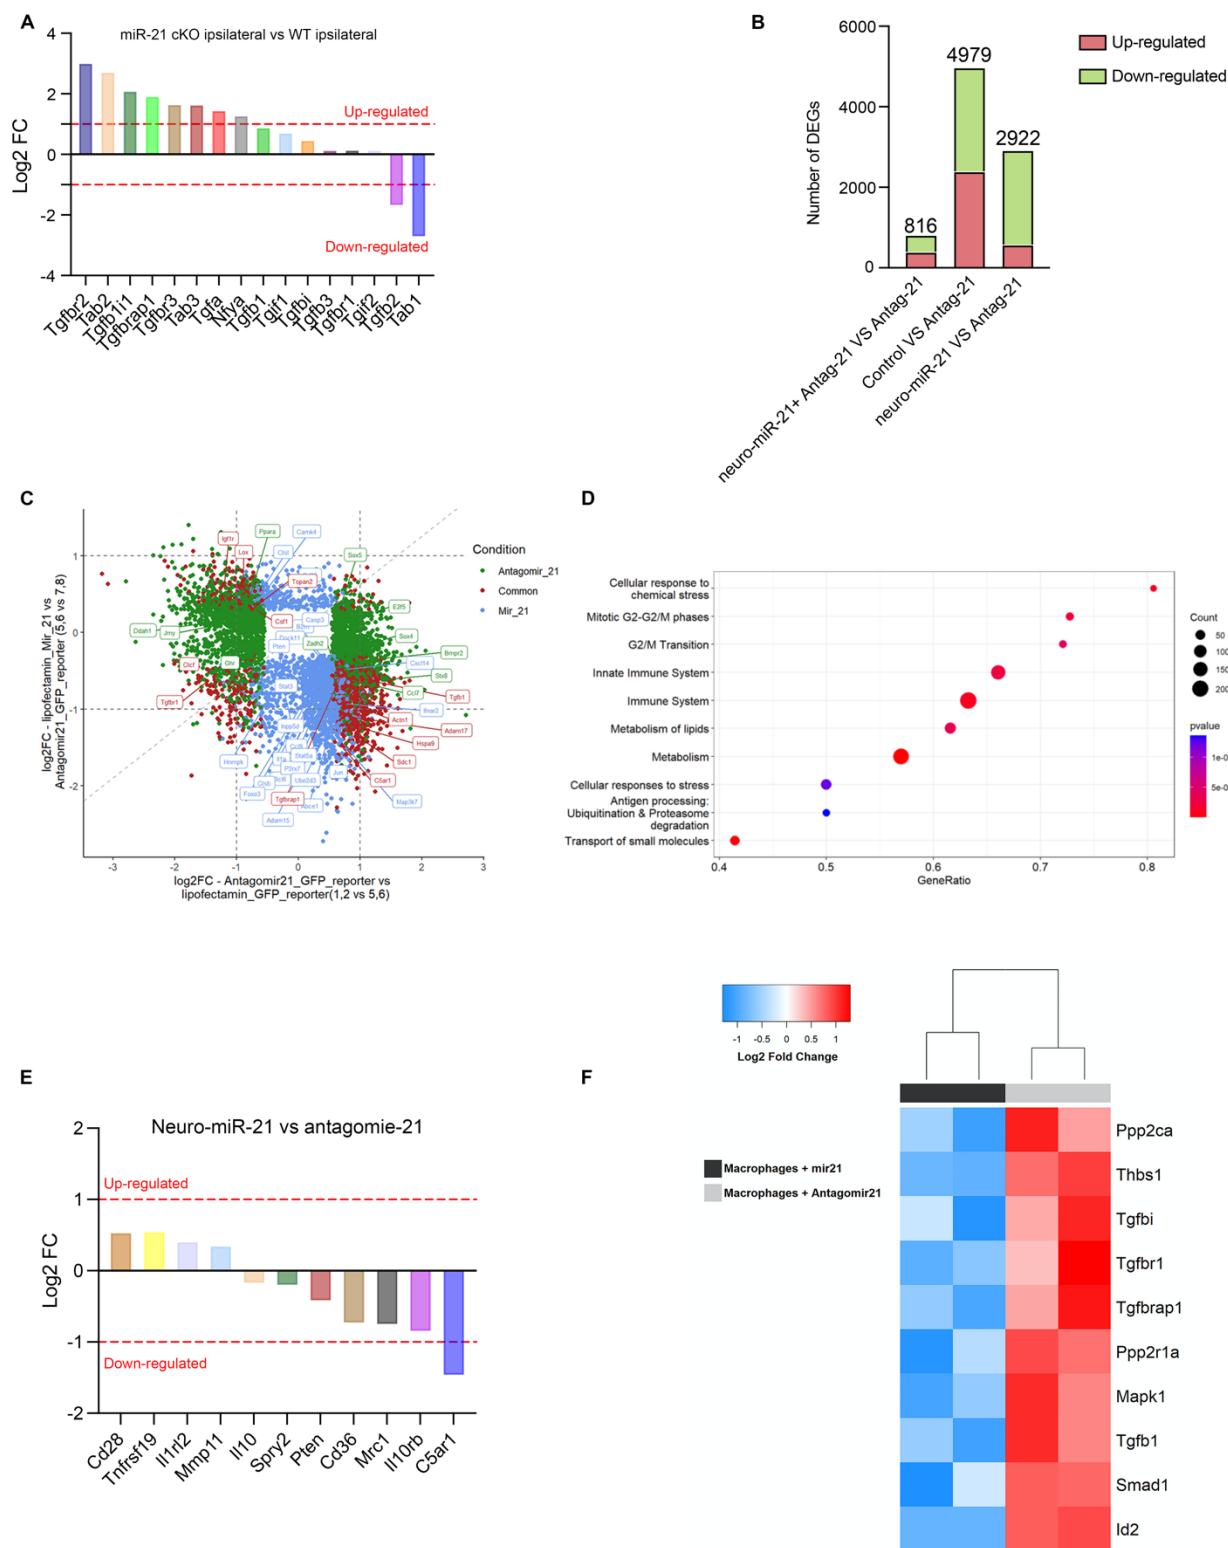

**Supplementary Figure 1: miR-21 induces a specific transcriptional profile in macrophages *in-vivo* and *in-vitro*.** Genome-wide microarray was performed on isolated macrophages (F4/80<sup>+</sup>CD11b<sup>+</sup>) from L4/L5 DRG of miR-21 cKO and WT control at 7 days after SNI **(A)** Bar charts represent the fold change of the *Tgfb*-related pathway gene changes in macrophages isolated from ipsilateral DRG of WT compared to miR-21-cKO ipsilateral DRG (n=5 mice/group). **(B)** Bar graphs represent the number of significantly up-regulated and down-regulated differentially expressed genes (DEGs) in peritoneal macrophages (PM) transfected with antagomir-21 exposed or not to neuronal exosomes overexpressing miR-21 (n=2, pooled from 6 mice in each replicate). **(C)** DEG comparison in PM transfected with miR-21 antagomir vs lipofectamine compared to PM transfected with miR-21 antagomir and exposed to neuron-derived miR-21. **(D)** Functional analysis of PM treated with antagomir-21 and exposed to neuron-derived miR-21. **(E)** Representative fold change of pro-inflammatory and anti-inflammatory genes in PM exposed to neuronal exosomes overexpressing miR-21 compared to antagomir-21 treated PM. **(F)** Heatmap showing the change of genes implicated in TGFB pathway in PM exposed to exosomes overexpressing miR-21 compared to antagomir-21 treated (n=2, pooled from 6 mice in each replicate).

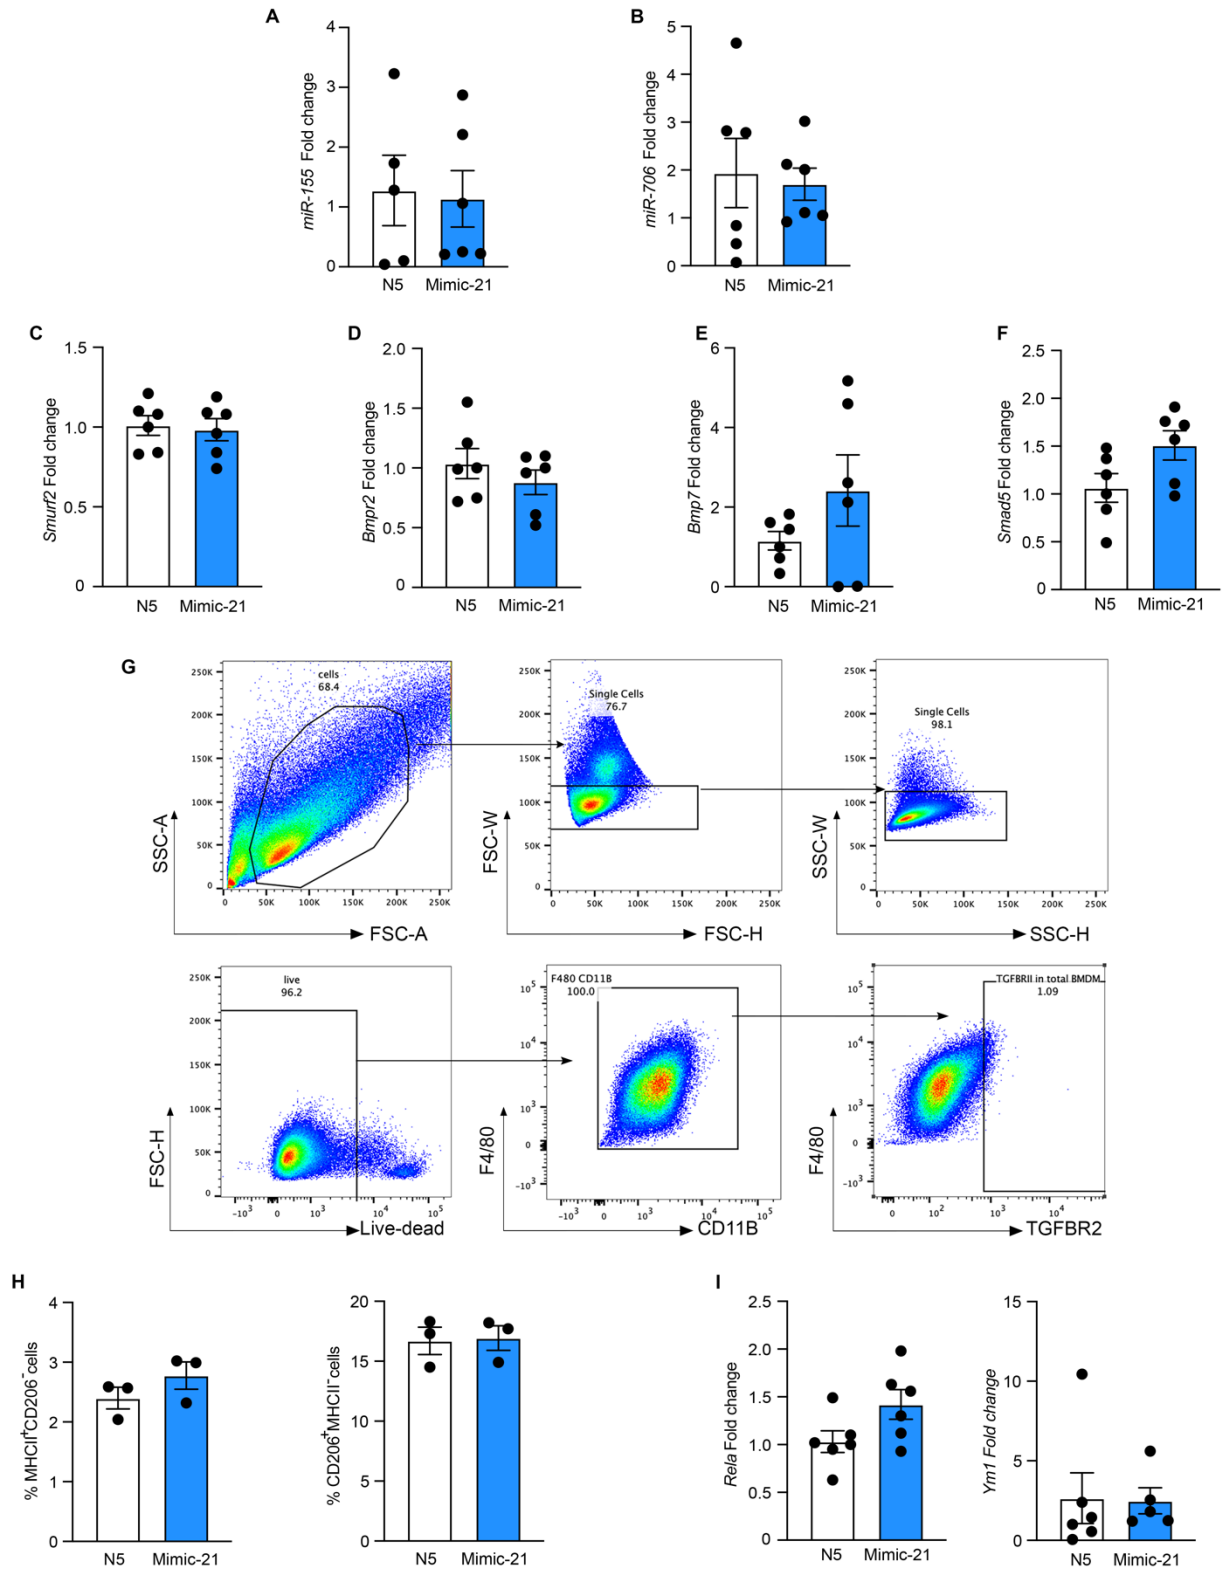

**Supplementary Figure 2: miR-21 fosters a pro-inflammatory phenotype in macrophages and downregulates TGFB signaling.**

**(A)** RT-qPCR of miR-155 and **(B)** miR-706 in PM after 48h of transfection with mimic-21 or N5 control (n=6). **(C)** RT-qPCR of *Smurf2*, **(D)** *Bmpr2*, **(E)** *Bmp7*, and **(F)** *Smad5* in PM at 48h after transfection with mimic-21 or N5 control (n=6), unpaired Student's *t*-test. **(G)** Flow cytometry gating strategy for TGFBR2 in the BMDM transfected with mimic-21 or N5 control. **(H)** Bar graphs show the percentage of MHCII<sup>+</sup>CD206<sup>-</sup> and CD206<sup>+</sup>MHCII<sup>-</sup> cells analyzed by flow cytometry, n=3 **(I)** RT-qPCR of *Rela*, and **(J)** *Ym1*, in PM transfected with mimic-21, n=5-6 per group. Data are presented as mean ± S.E.M.

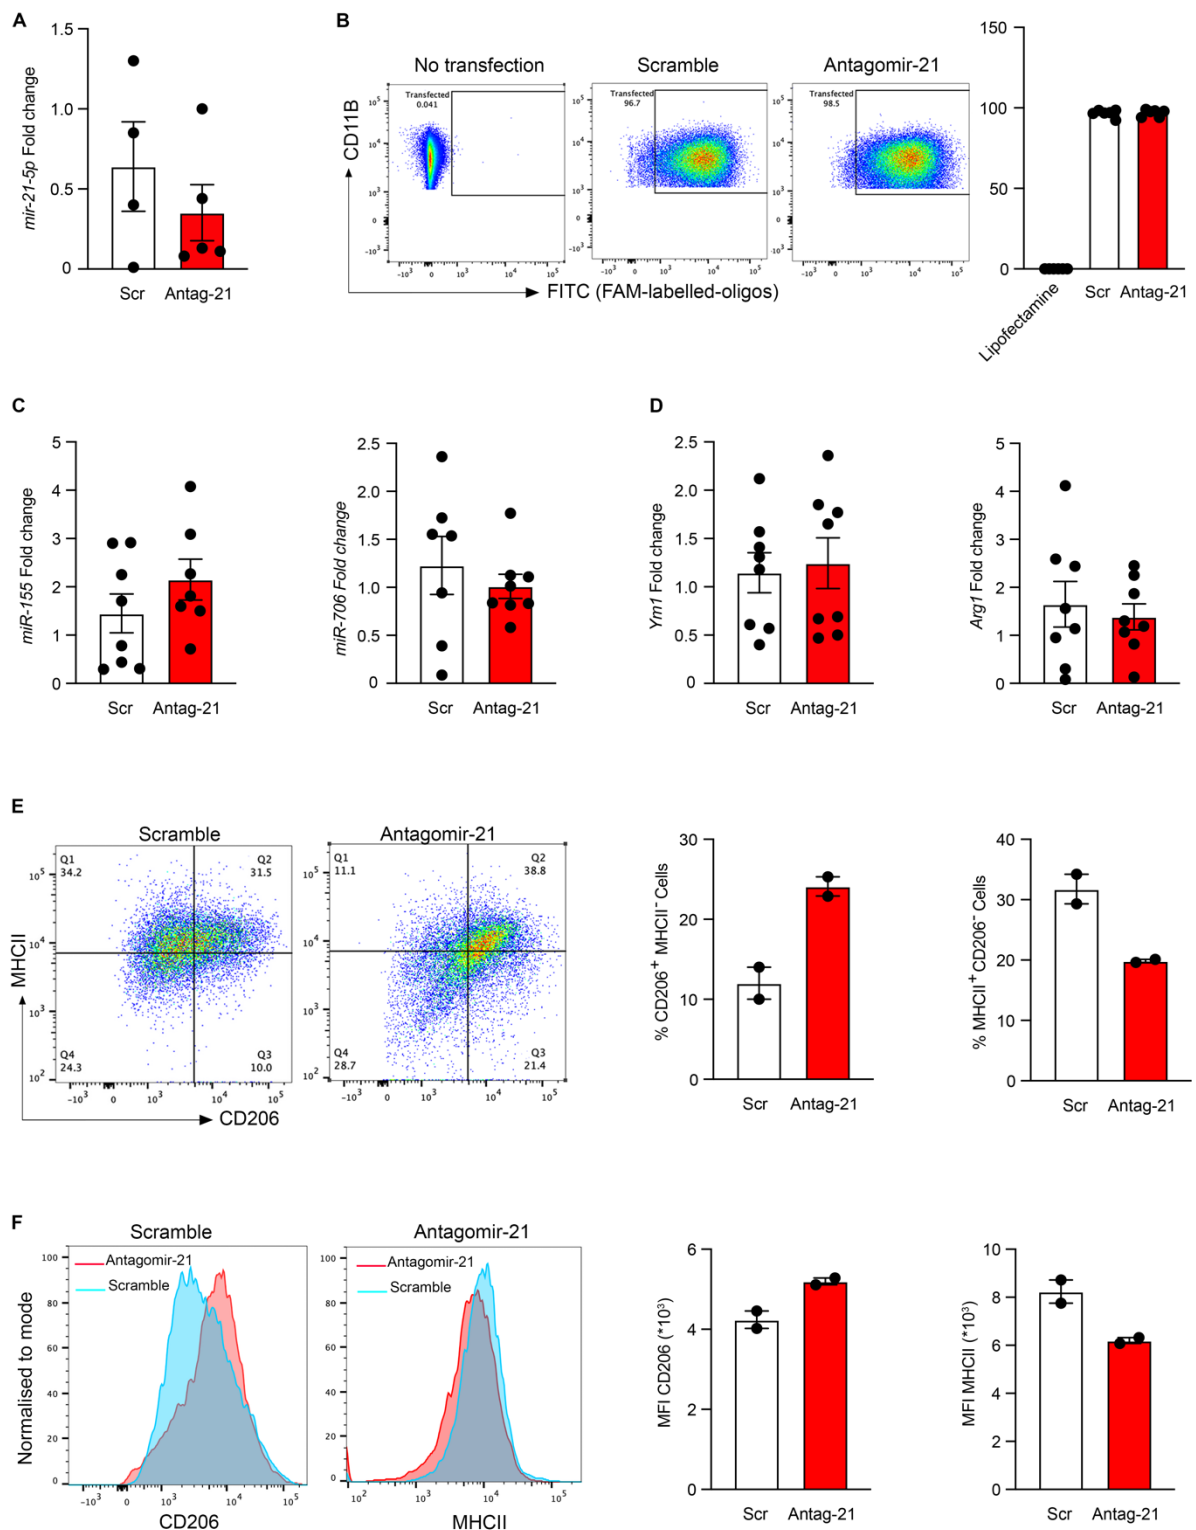

**Supplementary Figure 3: miR-21 silencing in sensory neurons induces an anti-inflammatory phenotype of macrophages.**

**(A)** miR-21-5p fold change in PM transfected with antagomir-21 or scramble control (n=4-5). **(B)** Flow cytometry analysis of antagomir-21 transfection efficiency in BMDM (n=4). **(C)** RT-qPCR of miR-155, miR-706 and **(D)** *Ym1*, *Arg1* in BMDM after miR-21-5p silencing (n=8). **(E)** Flow cytometry analysis of CD206, MHCII expression in BMDM transfected with antagomir-21 compared to scramble control (n=2 presented as mean of 2 independent experiments). **(F)** Representative histograms of CD206 and MHCII expression in BMDM transfected with antagomir-21 or scramble control by quantitative flow cytometry, the bar graphs represent MFIs of CD206 and MHCII respectively, (n=2 presented as mean of 2 independent experiments). Data are presented as the mean  $\pm$  S.E.M.

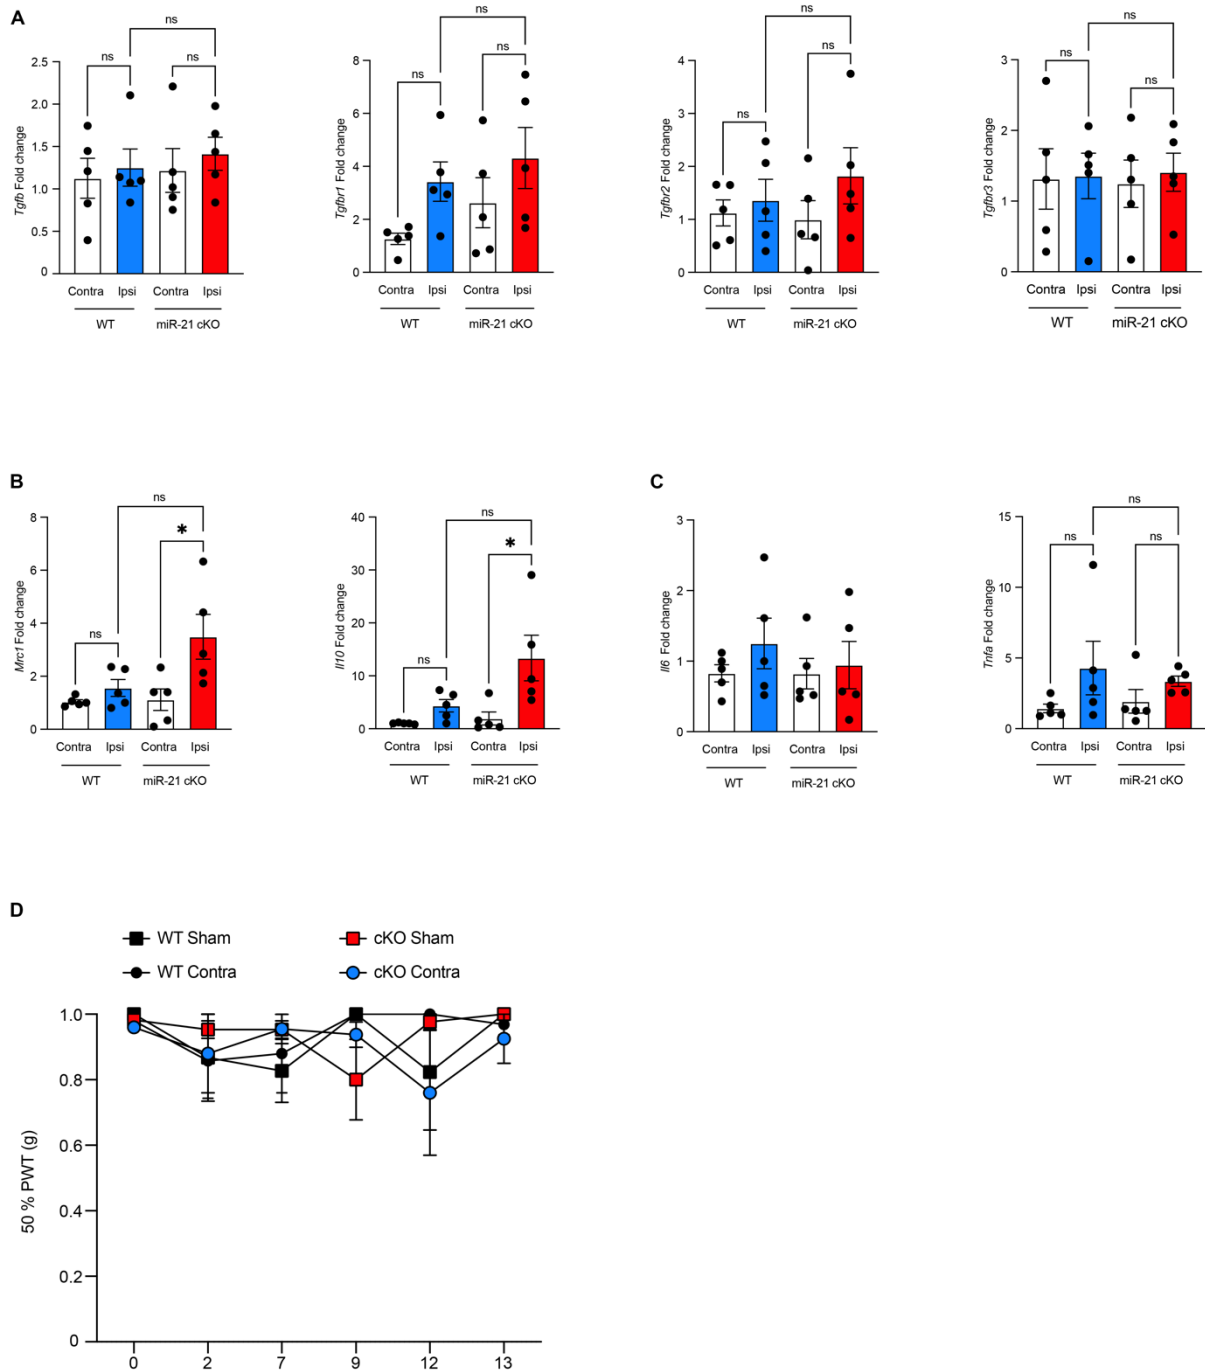

**Supplementary Figure 4: miR-21 silencing in sensory neurons has no effect on TGFβ-related pathway in DRG neurons. (A)** RT-qPCR of *Tgfb*, *Tgfbr1*, *Tgfbr2*, *Tgfbr3* and in the negative fraction enriched in DRG neurons (F4/80<sup>-</sup>), (n=5) **(B)** RT-qPCR of *Mrc1*, *Il10* and **(C)** *Il6*, *Tnfa* in the positive fraction enriched in macrophages (F4/80<sup>+</sup>), n=5, one-way ANOVA followed by Tukey's multiple comparison test. **(D)** miR-21 silencing in sensory neurons does not alter



contralateral thresholds in SNI compared to sham injuries (n=6). Data are presented as 50% PWT, Two-way ANOVA followed by Tukey multiple comparison test. Data are presented as mean  $\pm$  S.E.M.

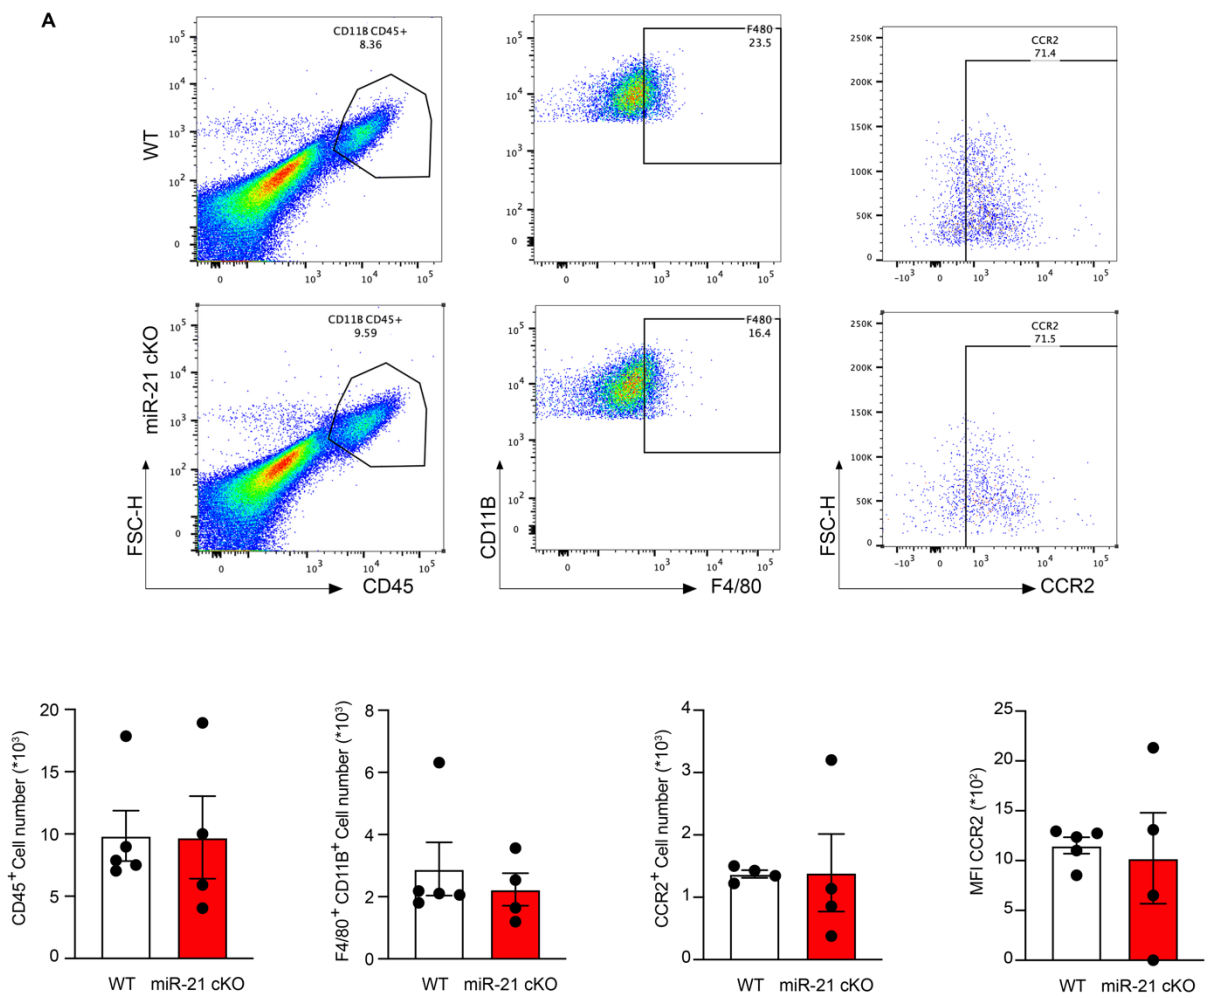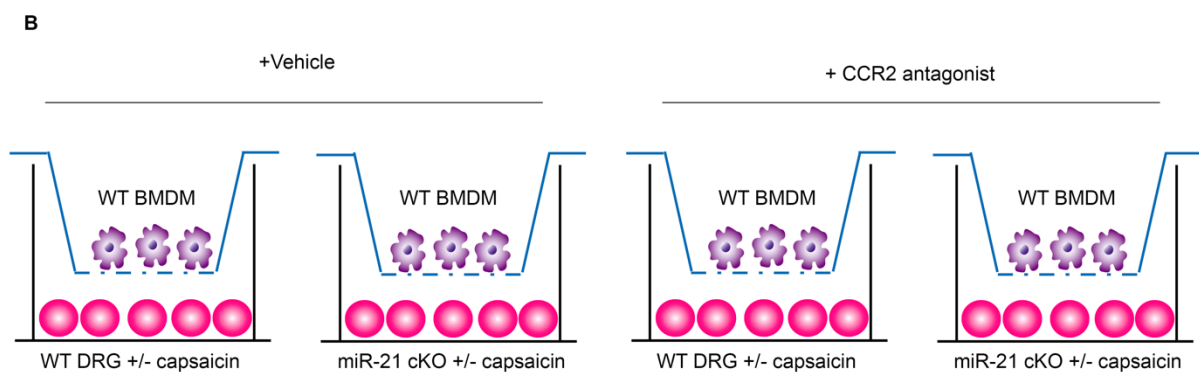

**Supplementary Figure 5: miR-21 silencing in sensory neurons does not affect sciatic nerve macrophages.**

**(A)** Flow cytometry analysis of CD45<sup>+</sup>, CD11b<sup>+</sup>F4/80<sup>+</sup>, and CCR2 expression in WT and miR-21 cKO sciatic nerves at day 7 SNI (n=4), Data are presented as mean  $\pm$  S.E.M. **(B)** Representative schematic of the Transwell™ design of DRG and macrophages trans-migration assay; WT and miR-21 cKO DRG neurons were cultured in the lower compartment stimulated with vehicle or capsaicin (1 $\mu$ M), and WT BMDM treated with vehicle or CCR2 antagonist were added to the top inserts.

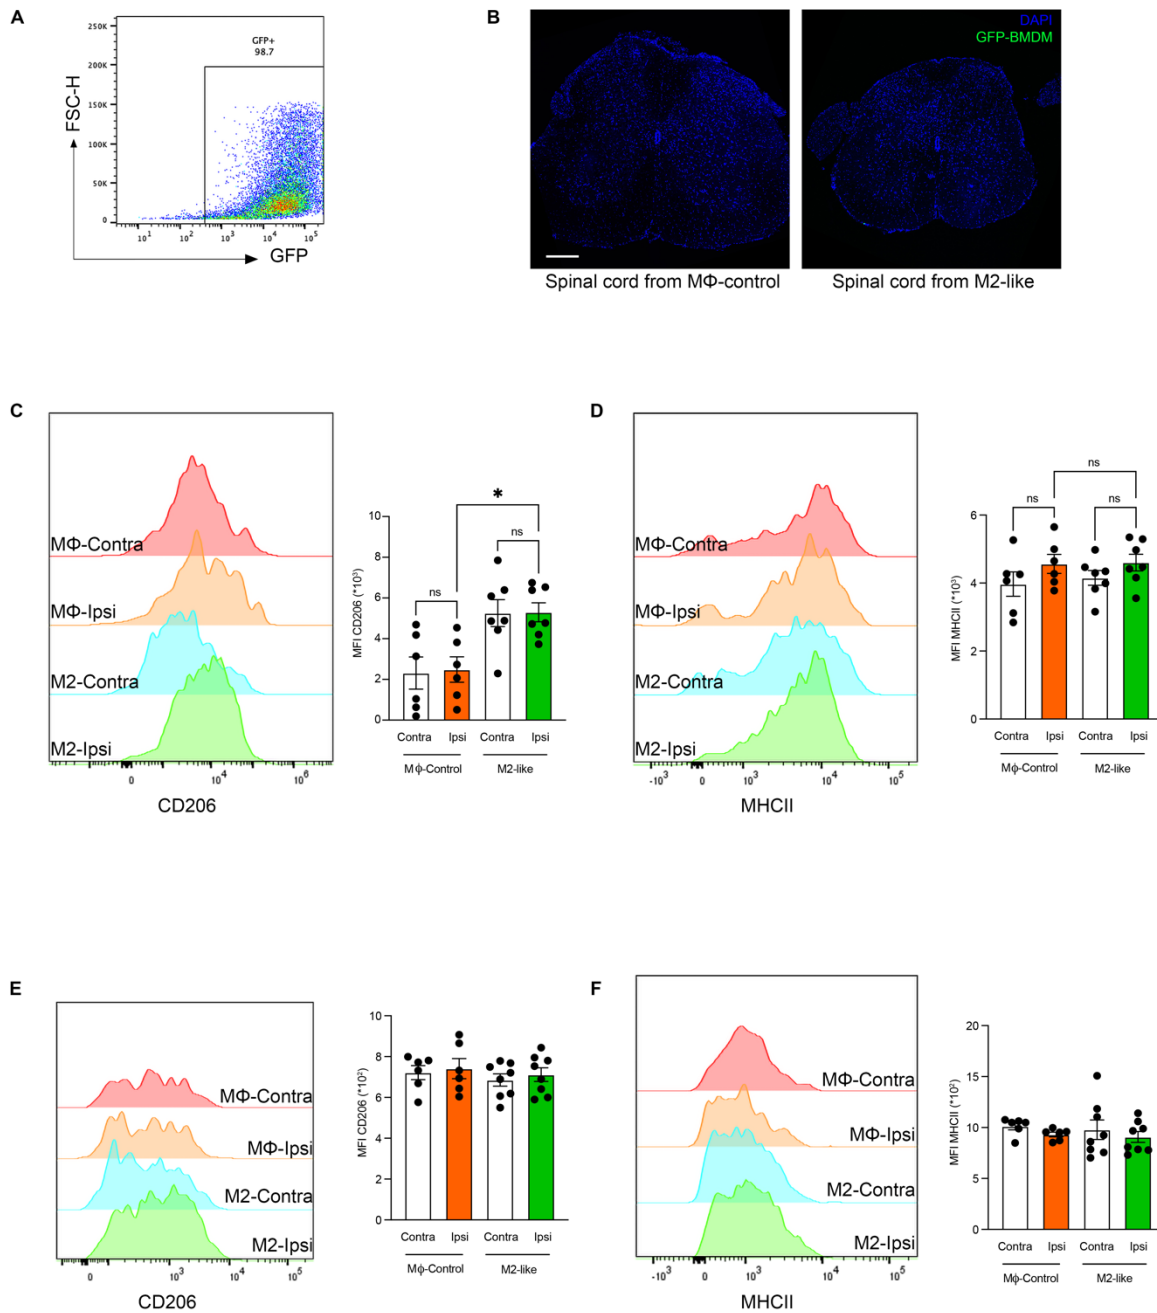

**Supplementary Figure 6: Intrathecal delivery of M2-like macrophages induces CD206 expression in the sNAMs.**

**(A)** Representative scatterplots of the injected GFP tagged BMDM. **(B)** Representative confocal images of cryo-sections of lumbar spinal cords at 2 h after i.t. injection of GFP<sup>+</sup> M $\phi$ -control or M2-like macrophages, scale bar 100 $\mu$ m. GFP signal was not detected. **(C)** Representative

histograms of CD206 expression in DRG F4/80<sup>+</sup>CD11b<sup>+</sup> at 2h after i.t injection, n=6-7, ns: not-significant, \*p<0.05 one-way ANOVA followed by Tukey multiple comparison test. **(D)** Representative histograms of MHCII expression in DRG F4/80<sup>+</sup>CD11b<sup>+</sup> at 2h after i.t injection n=6-7. **(E)** Representative histograms of CD206 expression in DRG F4/80<sup>+</sup>CD11b<sup>+</sup> at 48h after i.t injection. **(F)** Representative histograms of MHCII expression in DRG F4/80<sup>+</sup>CD11b<sup>+</sup> at 48h after i.t injection, n=6-8. Data are presented as mean  $\pm$  S.E.M, one-way ANOVA followed by Tukey multiple comparison test.



ANOVA followed by Tukey multiple comparison test. **(B)** Bar graph represents the number of the i.t. injected BMDM (FAM<sup>+</sup>) at 48h after injection (n=5), one-way ANOVA followed by Tukey multiple comparison test. **(C)** Bar graph shows the absolute cell number of CD206<sup>+</sup>MHCII<sup>-</sup>, MHCII<sup>+</sup>CD206<sup>-</sup> population in DRG at 48h after i.t. injection of scrambled-BMDM or antagomir-21-BMDM (n=4-5), one-way ANOVA followed by Tukey multiple comparison test. **(D)** Bar graph shows TGFBR2 expression in CD11B<sup>+</sup>F4/80<sup>+</sup> in DRG at 48h after i.t. injection, n=4-5, one-way ANOVA followed by Tukey multiple comparison test. **(E)** Bar graph shows TGFBR2<sup>+</sup>CD206<sup>+</sup> absolute cell number and **(F)** TGFBR2<sup>+</sup>MHCII<sup>+</sup> population in DRG at 48h after the i.t injection. (n=4-5), one-way ANOVA followed by Tukey multiple comparison test. data are presented as mean  $\pm$  S.E.M.
